# Supplementary material for: From Therapy Resistance to Targeted Therapies in Prostate Cancer
Source: Front Oncol. 2022 May 24;12:877379. doi: 10.3389/fonc.2022.877379 (PMC9170957; doi:10.3389/fonc.2022.877379)
Supplement: Supplementary file 2 [file Table_1.xlsx]

## Sheet: Sup. Table 1
Supplementary Table 1. Molecular targets and potential drugs for the management of therapeutic resistant prostate cancer.
Target	Drug	Mechanism of action	Clinical Trials Identifier	Tumor type	Drug effects	References
AR mutations	galeterone	CYP17A1 inhibitor, AR antagonist and AR T878A mutant degradator	NCT01709734, NCT02438007	CRPC	induced a selective AR T878A mutant degradation in vitro; impairs the binding of AR to ARE sites on target genes; inhibits AR	70
AR variants	EPI-506	inhibitior of AR N-terminal domain. Is a prodrug of the EPI-001 analogue EPI-002	NCT02606123	CRPC	inhibits AR activity as transcription factor; reduces AR+ tumor cell proliferatiion and decreases tumor growth iin vivo	92
					inhibits AR activity; anti-tumor activity in resistant cell lines; decreased expression of AR-V target genes; decreased cell groeth in vitro and in vivo. In combination with the PI3K/Akt inhibitor BEZ235, there was an increase in the anti-neoplastic response in CRPC	93
	EPI-001	blocks the N-terminal domain transactivation, impairing transcription activity of AR by interacting with the AF-1 region	N.a.	CRPC	inhibits AR protein-protein interactions; blocks AR activity as transcription factor; inhibits AR variants lacking the LBD, such as ARv567es; good pharmacokinetics properties; its analogues retain anti-tumor properties; in vivo reduces CRPC tumor growth	94
					inhitits AR activity and protein-protein interactions; decreases AR binding to ARE; inhibits the constitutivly active AR due to lack of LBD; impairs proliferation and induces apoptosis; in vivo: decreases androgen-dependent tumor growth and survival, with no toxic effects	95
	niclosamide	anti-helmintic reporposed as a AR-V7 inhibitor by mediating protein degradation	NCT03123978, NCT02807805, NCT02532114	CRPC	downregulation of AR-V7; degradation of AR-V7 via proteasome mechanisms; decreases AR-V7 binding to ARE in target genes, such as PSA; inhibits tumor gowth bopth in vitro and in vivo; in combination with enzalutamide, enhanced the response of CRPC cells to this ADT compund	71
	thailanstatins	inhibits AR splicing to AR-V7	N.a.	CRPC	in vitro, inhibited proliferation; the CRPC cell line DU145 was the most responsive	96
				CRPC	decrease AR-V7 expression both at transcript and protein levels; inhibits AR-V7 splicing; in vivo: induces apoptosis in CRPC xenografts; anti-tumor effect	97
	peptidomimetic D2	smal-molecule that targets the transactive domain of AR variants	N.a.	CRPC	stable, reduced toxic effects and good uptaken by PCa cells; impairs AR translocation into the nucleus; inhibits AR activity; prevents AR interaction with its co-regulators; inhibits PCa cells proliferation; in vivo: decreases tumor growth	98
	ONC201/TIC10	targets AR and AR-V7	N.a.	PCa	inhibited proliferation and induced apoptosis in both castration-sensitive and resistant cells; decreased the expression of AR-V7 and PSA; it can be used in combination with enzalutamide, docetaxel or everolimus for CRPC managment	99
Co-regulators	RO4929097	inhibits y-secretase, impairing NOTCH activity and downstream function of the AR co-activator GATA2	NCT01200810	CRPC	reduces cell proliferation and invasion; in vivo, decreased tumor growth; oin combination with abiraterone, had a synergistic effect, leading to decreased cell proliferation, invasion and migration	71
				CRPC	inhibited NOTCH1/4 activity, impairing the AR co-activator GATA2 and AR signaling; in combination with enzalutamide in vivo, improved the response to enzalutamide, decreasing tumor cell growth and bone metastasis	74
	PF-3084014/PF-03084014/Nirogacestat		N.a.	CRPC	in combination with ADT, in ADT-resistant cell, it improved the response to enzalutamide and also improved the response in cells resistant to both ADT and docetaxel	73
				PCa	inhibited the NOPTCH signaling; reduced cyclin E, Bcl-2 and Bcl-xl expression; impaired the activation of the PI3K/Akt, EGFR and NF-kB signaling; impaired EMT and stem-like properties of cancer cells; in combination with docetaxel, decreased tumor cells proliferation in both soft tissue and bone	75
				CRPC	inhibited NOTCH1/4 activity, impairing the AR co-activator GATA2 and AR signaling; in combination with enzalutamide in vivo, improved the response to enzalutamide, decreasing tumor cell growth and bone metastasis	72
	DAPT/GSI-IX		N.a.	PCa	inhibited NOTCH pathway; reduced p-38 and Bcl-2 expression; in ADT-sensitive cells, it lead to an increased response, reducing proliferation and colony formation, while promoting apoptosis; in vivo, impaired tumor growth	100
				CRPC	inhibited NOTCH1/4 activity, impairing the AR co-activator GATA2 and AR signaling; in combination with enzalutamide in vivo, improved the response to enzalutamide, decreasing tumor cell growth and bone metastasis	74
				CRPC	reduces cell proliferation and invasion; in vivo, decreased tumor growth; in combination with abiraterone, had a synergistic effect, leading to decreased cell proliferation, invasion and migration	72
	BMS-708163/avagacestat		N.a.	CRPC	inhibited NOTCH1/4 activity, impairing the AR co-activator GATA2 and AR signaling; in combination with enzalutamide in vivo, improved the response to enzalutamide, decreasing tumor cell growth and bone metastasis	74
	CSRM617	binds to and inhibits ONECUT2 function as transcript factor	N.a.	PCa	impaired cell growth, while promoting apoptosis; in vivo, impaired metastasis onset and decreased tumor size both at the primiary tumor and metastatic sites, without toxic effects	101
Bypass signaling	PKI 166	HErbB1 and ErbB2 inhibitor	N.a.	CRPC	inhibits ErbB1 and erbB2 RTK activity both in vitro and in vivo; impairs the activity of the downstream kinase ERK; in vivo: inhibits tumor growth under castrate levels of testosterone;	102
				PCa	in vivo: inhibits EGFR phosphorylation and activiation. In combination with the PDGFR inhibitor STI571 and paclitaxel: there was na additional inactivation of the PDGFR; in combination, induced apoptosis, redued proliferation, preserved bone tissue and decreased lymph node metastasis; supress experimental metastatis to the bone	103
				PCa	in vivo: in mice treated with OKI 166 oral versus PKI 166 oral combined with paclitaxel injectable it was observed a decrease in the size of the bone metastases; inhibited EGFR autophosphorylation; pomoted apoptosis; decreased tumor cell growth and metastasis	104
	ZD1839/gefitinib		NCT00483561, NCT00242918, NCT00265070, NCT00025116, NCT00635856, NCT00239291, NCT00241475, NCT00085566	solid tumors, including CRPC	inhibited proliferation; inhibited EGFR, HER2 and HER3 activation by phosphorylation; decrease of downastream targets activation, such as AKT; effect is enhanced in HER2 overexpressing tumors; in CRPC cells DU145, it was observed a moderated response, accompained by AKT activity inhibition, without HER2 overexpression	105
				CRPC	decreased tumor cell (DU145) survival in a dose dependent manner; increased expression of p27 and p21, impairing cell division; promoted apoptosis	106
				PCa	in vivo: decreased tumor cell gorwth of both androgen-dependent and independent xenografts, being more effective in the CRPC models; inhibited EGFR; in combination with enzalutamide, it restored the anti-proliferative effects of the ADT in the refratory xenografts, but also improved efficacy of chemotherapeutic agents; in combination with paclitaxel alone, were observed mice tumor-free	77
				PCa, including CRPC	inhibited cell proliferation in a dose and time-dependent manner; had a cytostatic effetc, by arresting cell cycle at G0/G1; in DU145 it led to p27 expression; when combined with anti-androgens, it led to na additive effect	107
				PCa	inhibited tumor cell gowth; induced cell cycle arrest at G1 and apoptosis; it displayed an increased sensitivity in PTEN positive PCa cell lines; in PTEN negative cells, combination with ERK1/2 or PI3K inhibitors potentiates the anti-tumor effects;	108
				CRPC	inhibited tumor cell invasion and decreased proliferation; promoted cell cylce arrest at G0/G1 phase; inhibited EGF-dependent EGFR phosphorylation; impairs PI3k/AKT activation mediated by EGF	109
				PCa	decreased EGFR activation; reduced cell proliferation; induced apoptosis; in prymary cultures, inhibited EGF-mediated EGFR autophosphorylation;	110
				CRPC	in vivo: reduced xenograftd growth; impaired the formation of bone metastasis	111
	3BrQuin-SAHA & 3ClQuin-SAHA	EGFR inhibitor	N.a.	PCa	besides inhibiting EGFR, it also inhibits HDAC activity; impaired cell growth and promoted caspase-3- mediated apoptosis; inhibited angiogenesis,	112
	Spautin-1		N.a.	PCa	inhibits EGFR activation and its downstream targets activity; induced cell cycle arrest and apoptosis; downregulated Glut1; in vivo, had na anti-neoplastic effect both alone, and in combination with ADT	113
	ZINC05463076 or ZINC2102846 or ZINC19901103		N.a.	PCa	alone, inhibited EGFR phosphorylation and activity; impaired cell proliferation and reduced colony formation in a dose-dependent manner; lead to cell cycle arrest	114
	PD168393		N.a.	CRPC	CRPC cell lines were highly sensitive to treatment; induced growth inhibition; potentiates the resposnse of CRPC cell lines to paclitaxel; induced bad, p53 and p21 expression; inhibits EGFR and ERK1/2 activation	115
	CUDC-907	PI3K inhibitor	N.a.	PCa	inhibited PI3K signaling, but also HDAC6 activity; however, resulted in higher pERK levels, suggesting a potential resistant mechanism; lead to cell viability reduction, apoptosis and DNA damage; downregulated Wee1, CHK1, RRM1 and RRM2; in vivo,impaired tumor growth	81
	BAY1082439		N.a.	PCa	inhibited PI3K; in vivo, it impaired PTEN- tumor growth and the EMT process; reduced B-cell infiltration and the release of lymphotoxin	116
				PCa	induces CD8+ T cell anti-tumoral immunity in vivo; promoted IFNalpha and gama activation; induced B2-microgobulin expression and CXCL10/CCL5 secretion	117
	SF2523		N.a.	PCa	reduced tumor cell survival and proliferation, while promoting apoptosis; besides inhibiting PI3K, it also targeted BRD4, downregulating cyclin D1, c-MYC and Ar expression; in vivo, impaired tumor growth	118
	LASSBio-2208		N.a.	CRPC	had a potent anti-tumor effect; it inhibited PI3K, but also HDAC6 activity; reduced cell viability and migration; induced apoptosis and cell cycle arrest at G2/M phase; impaired JNK, JAK/STST3 activity; reduced IL-6 secretion	119
	ZSTK474		N.a.	CRPC	specifically inhibited PI3K activity; impaired migration, invasion and adhesion, reducing MMP and VEGF secretion; reduced HIF-1alpha expression	120
				CRPC	impaired migraton, invasion and adhesion; downregulated Girdin, integrinb1, MMPs, HIF-1alpha and VEGF expression; in vivo, decrease bone metastases	121
	isorhamnetin		N.a.	CRPC	downregulated p-PI3K, p-AKT and p-mTOR, inhibiting their activity; impaired cell proliferation, migration and invasion; promoted LDH release; promoted MET and decreased MMP-2 and MMP-9 expression	122
	4-Acetylantroquinonol B		N.a.	PCa	both in vivo and in vitro, it reduced cell tumor cell growth; impaired migration and angiogenesis; in vivo, it impaired metastasis formation	123
	BEZ235/dactolisib	Dual inhibitor of PI3K and mTOR	NCT01717898, NCT01634061	PCa	impaired PI3K and mTOR activity, in a dose-dependent manner; reduced proliferation, colony formation and induced cell cycle arrest at G2/M phase; reduced the foci of yH2AX; in vivo, treatment improved the tumor response to radiation therapy	124
				PCa	reduced p-AKT; it reduced cell viability; in combination with docetaxel, it re-sensitized tumor cells to the chemotherapeutic agent; in vivo, the combination reduced tumor growth	78
				PCa	inhibited PI3K signaling; decreased cell viability, promoting apoptosis in PTEN-WT cells; in PTEN- cells, it lead to decreased cell viability due to autophagua	125
				CRPC	in vivo: in mice with PTEN deletion, it has a cytostatic and anti-proliferative effetc; it had some off-target effects, particularly, upregulation of HER3, AR and ERK; increased some AR target genes expression; thus, a co-treatment strategy targeting PI3K and AR induced apoptosis	126
	GDC-0068/Ipatasertib	AKT inhibitor	NCT03072238, NCT01485861, NCT01562275, NCT01090960	CRPC	reduced cell viability; lead to cell cycle arrest; inhibited AKT signaling through a decrease in pAKT and its downstream targets; hormone-sensitive cell lines also responded to treatment, in na higher extent, compared to ADT; AKT inhibition lead to GR expression inhibition, decreasing GR-regulated genes expression; in combination with enzalutamide, induced apoptosis and a impressive tumor cell gr…	76
				CRC	anti-tumor effect; inhibited AKT, leading to PUMA activation , in a p53-independent manner; activates FoxO3a and NFk-B; up-regulates apoptosis	127
				solid tumors, including CRPC	inactivated AKT signaling, decreasing downstream targets activation, both in vitro and in vivo; treatment lead to cell cycle arrest and reduced cell viabilty; in vivo, induced a decrease in tumor growth, sensitizing tumors to standard chemotherapeutics	128
	MK-2206		NCT01251861, NCT01480154, NCT01295632	PCa	decreased cell motility, aerobic glycolysis and NAD+; in 3D models, there was a reduction in the production of lactate	129
				CRPC	AKT inhibition, with reduced phosphorylation; increased the apoptotic levels and induced cell cycle arrest at G1; reduced CHKA, HK2 and LDHA expression; in vivo, reduced tumor growth	130
	AZD5363		NCT04087174, NCT02121639, NCT01692262, NCT03310541, NCT02465060	PCa	in vivo, inhibited AKT and its downstream targets, decreased growth of both HSPC and CRPC/PTENmut tumors	131
				CRPC	inhibited AKT; decreased p-mTOR, p-P70S6K and p-S6k; promoted cell cyle arrest at G2 and autophagy; in vivo, it impaired tumor growth	132
				PCa	impaired cell proliferation, enhancing sensitivy to ADT therapy; in vivo, impaired PTEN- tumor growth; in combination with ADT, it lead to higher tumor regression; inhibited AKT, upregulating PSA, TMPRSS2 and FK506 expression	133
				CRPC	in AR+ in vivo HSPC and CRPC, it impaired proliferation and induced apoptosis; however, it lead to the binding of AR to ARE of target genes; so, combination with ADT had a synergistic effect on cell proliferation inhibition and increase apoptotic levels in vitro, with stabilization of the PSA levels in in vivo	134
	GNE-493		N.a.	Pca	impaired cell viability, proliferation and migration of PCa cells, inducing apoptosis; inhibited Akt activation; PCa cells with constitutively-active mutant Akt1 partially reactivtes Akt, decreasing the response to GNE-493	135
	RAD001/everolimus	mTOR inhibitor	NCT00630344, NCT00459186, NCT00574769, NCT00629525, NCT01051570, NCT00636090, NCT00526591, NCT00814788, NCT00943956, NCT01548807, NCT00085566, NCT01642732, NCT00976755, NCT02125084, NCT01313559, NCT02106507	CRPC	inhibited mTOR; decreased the expression of HIF-1alpha and SK1; in combination with docetaxel, it increased the anti-neoplastic effect of the chemotherapic drug; in vivo, decreased tumor size, being this enhanced when combined with docetaxel	136
				advanced PCa	reduced tumor size and PSA levels; in combination with docetaxel, it enhanced tumor size reduction; inhibited tumor cell growth in the bone	79
				PCa, including CRPC	tin vivo, reatment re-sensitized hormone-resistant tumors to bicalutamide treatment, reducing tumor growth and size	137
				CRPC	inhibited mTOR; downregulated SK1 and VEGF expression; in vivo, impaired tumor growth alone, and combined with docetaxel; reduced VEGR expression and vasculature of the tumor	138
	MK-2206 + MK-8669	AKT + mTOR inhibitors	N.a.	PCa	had anti-neoplastic effects in vivo	139
				CRPC	in vivo, the combination inhibited AKT and mTOR signaling; the combination had significantly beter results, impairing CRPC proliferation, reducing tumor weight, and inhibiting p-AKT, pS6 and RB activity	140
	CB-03-10	Glucocorticoid receptor inhibitor	N.a.	CRPC	binds and inhibitis, via antagonism, both the glucocorticoid and androgen receptor, impairing their transcriptional activity; had na anti-neoplastic activity, inducing caspases activation and apoptosis; in vivo, reduced tumor growth	82
	RU486/Mifepristone		NCT00140478, NCT02012296, NCT02014337	PCa	stable, reduced toxic effects and good uptaken by PCa cells; impairs AR translocation into the nucleus; inhibits AR activity; prevents AR interaction with its co-regulators; inhibits PCa cells proliferation; in vivo: decreases tumor growth	141
				CRPC	inhibited GR activity; in combination with docetaxel, impaired colony formation of PCa doxetaxel-resistant cells, resensitizing them to docetaxel treatment; decreased Bcl-2 and Bcl-xl protein expression;	80
				PCa	in vivo, impaired tumot growth and weight, being more effective in CRPC models	142
	XY018	RORy inhibitors	N.a.	PCa	in chemotherapy resistant PCa cells, it reduced tumor cell proliferation, inducing apoptosis	143
	GSK805		N.a.
	SR2211		N.a.
	MP470/amuvatinib	RTK inhibitor	N.a.	PCa	anti-neoplastic effect in different PCa and CRPC cell lines; lead to apoptosis; inhibited HER proteisn activation and downstream effects; in combination with the EGFRi erlotinib, this had na additive effect, increasing MP470 cytotocix effects on tumor cells; in vivo, the combination increased tumor growth inhibition	83
	GSK1838705A	IGF1R inhibitor	N.a.	PCa	potently decreased IFG1R phosphorylation and activity; reduced cell viability, being more effective in docetaxal-resistant PCa cells, in which induced apoptosis and inhibited migration; in vivo, impaired docetaxel-resistant tumor growth	144
	NVP-AEW541		N.a.	PCa	in PTEN wt tumor cells, impaired cell proliferation, reducing viability in a dose- and time-dependent manner; in PTEN WT cells, it lead to a resensitization to radiation therapy; decreased phospho-Akt and imcreased DNA double stranded breaks	145
	AZ12253801		N.a.	PCa	inhibited IGF1R, increasing tumor cells response to radiation therapy; impaired the repair of DNA DSB via NHEJ and HR	146
	PD325901/Mirdametinib	MAPK/ERK inhibitor	N.a.	CRPC	in 3D models of CRPC, it inhibited cell proliferation, reducing spheroid size; inhibited ERK phosphorylation and activation; in vivo, it retained a selective ERK inhibitory potential; decreased tumor growth in a dose-dependent manner; treatment induced an upregulation of compensatory pathways, such as IKK, hedgehog and PI3K, suggesting a potential for combined therapies to synergistically inhibit…	84
	U0126	MEK/ERK inhibitor	N.a.	PCa	inhibited MEK/ERK signaling; decreased c-MYC expression; impairs growth; re-sensitized PCa cells to RT, both in vitro and in vivo; decreased the anti-apoptotic protein BMX	147
	MLN8237/alisertib	selective binds to AUKRA, inhibiting its activity	NCT01094288, NCT01799278, NCT02038647	CRPC	growth inhibition at 100nM; this effect was enhanced in cells expressing high levels of AR	60
	BMS-354825/dasatinib	Src inhibitor	NCT00439270, NCT00385580, NCT00918385, NCT01826838, NCT00860158, NCT00744497, NCT01260688, NCT00570700, NCT04925648, NCT00936975, NCT01990196, NCT01254864	PCa	inhibited Src, and also AKT phosphophorylation by IGF-1; in vivo, it decreased tumor growth; the combination with the IGF-1 inhibitor BMS-754807, enhanced pathway inactivation and further impaired tumor growth	148
				PCa	inhibited Src; reduced cell proliferation, migration and invasion; in vivo, reduced SRC family protein expression, decreasing tumor growth and proliferation and lymph node metastases	149
				PCa	inhibited Src actitivy, but also SFK and Lyn and their downstream signaling; impaired adhesion, migration and invasion at low doses	150
				PCa	inhibited Src activity; impaired EGF-mediated AR phosphorylation and target genes expression; in vivo, reduced colony formation	151
				PCa	inhibited Src phosphorylation and activation; impaired Src downstream targets activity, such as FAK, STAT3, Paxillin and Akt; reduced migration, invasion and the metastatic potential of cells; in vivo, it decreased angiogenesis	152
				PCa	in BRCA2- cells, treatment inhibited Src acitivity, increased DNA damage and improved sensitivity to PARP inhibitors	153
				CRPC	inhibited RANKL-mediated osteoclast differentiation in bone and their activity	154
	AZD0530/saracatinib		NCT00513071, NCT00558272, NCT01267266	PCa	inhibited Src activity in a dose-dependent manner; decreased cyclin D1 and c-MYC expressin, inducing cell cycle arrest at G1 phase; impaired cell motility and p130CAS and paxillin activity; in vivo, impaired tumor growth and migration	155
				PCa	inhibited Src activation and focal adhesion kinase and p38 activation; impaired tumor cell proliferation and invasion; downregulated IL-8 and MMP-9 expression; inhibited the RANKL-induced osteoclastogenesis; in vivo, reduced the development of osteolitic lesions, preserving bone structure	156
	SKI-606/bosutinib		N.a.	PCa	reduced Src activation and AKT phosphorylation; downregulated the expression of uPAR, MMP-2, MMP-9, NCAD, fibronectin, BMP-2, BMP-6, IL-8 and TGFb; impaired cell proliferation, migration and invasion; in vivo, it reduced tumor size and the presence of bone lesions	157
	BMS-777607	cMET inhibitor	N.a.	PCa	impaired HGF-mediated cell scattering, migration and invasion in a dose-dependent manner; inhibited c-MET phosphorylation and AKT activiation, impairing the metastatic cascade	158
				CRPC	inhibited MET phosphorylation and activity, but also the downstream Src and AKT signaling; at nanomolar doses, it reduced proliferation, colony formation, migration and invasion	159
	GPB730	STAT3 inhibitor	N.a.	PCa	in vivo, and in combination with anti-CTLA-4, impaired tumor growth and improved survival; aumented CD45+ and CD8+ cells in the TME, while decreasing Tregs; GBP730 inhibited STAT3 activity, improving the response to anti-CTLA-4 treatment	160
	Acacetin		N.a.	CRPC	bind and inhibited STAT3 activity, downregulating the expression of STAT3 target genes; promoted apoptosis, inducing ROS production; in vivo, it decreased tumor growth	161
	GAP500/Galiellalactone		N.a.	PCa	inhibited STAT3; decreased docetaxel-resistant tumor cells viability; decreased CSCs viability and colony and sphere formation; downregulated STAT3 target genes expression	162
				PCa	reduced viability and proliferation, while promoting apoptosis; in vivo, it impiared tumor growth and spread to lymph nodes	163
				CRPC	not only inhibited STAT3, but also AR activity; downregulated cyclin D1 expression, inducing cell cycle arrest and decreaed proliferation; in vivo, decreased tumor size and PSA levels; when conbined with ADT, had na additive effect, impairing AR activity and cell proliferation	164
	EC-70124		N.a.	PCa	inhibited STAT3, JAK2 and also NF-kappaB; inhibited proliferation and colony formation; in vivo, impaired tumor growth; was very potent against CSC	165
Cytokines	G23-8	antibody that binds, blocks and inactivates IL-23	N..a	CRPC	in mice, combination of G23-8 with the ADT drug enzalutamide, improved the response to enzalutamide. It was observed a reductaion in tumor size and tumor cell proliferation, while increasing apoptosis; inhibition of AR activity, reversing the castration-resistant state.	49
DNA repair pathway	AZD-2281/olaparib	PARP inhibitor	NCT03834519, NCT04336943, NCT03570476, NCT03317392, NCT03516812, NCT03047135, NCT04951492, NCT02893917, NCT02769962, NCT04586335, NCT02484404, NCT03434158, NCT04556617, NCT03012321, NCT02987543, NCT02324998, NCT03874884, NCT03810105, NCT01972217, NCT04038502, NCT03732820	NEPC	impaired the MYCN-PARP-DDR pathway, imparing PARP1/2, BRCA1, RMI2, POLE and TOPBP1 activities; in combination with the AURKA inhibitor PHA739358, there was na enhancement of these inhibitory activities; olaparib alone induced cell cycle arrest at G1 and decrwased cell viability, proliferation, colony formation and migration; again, the combination displayed enhanced anti-tumoral effects; in vivo,…	87
				PCa	inhibited PARP activity; treatment re-sensitized tumor cells to radiation therapy, decreasing proliferation in vivo, and colony formation	166
				PCa	had an anti-tumoral and cytotoxic effect; when conbined with ADT, there was an additive effect in the AR+ BRCA mutated LNCaP cell line; after ADT resistance, cells remain sensitive to the anto-neoplastic effects of olaparib	88
				PCa	in AR+ cells, treatment inhibited the expression of HR genes, which was more significanr when combined with enzalutamide; in combination, lead to a deficient DNA repair-mediated cytotoxicity; the combination reduced colony formation and proliferation, and promoted apoptosis; in vivo, it reduced tumor growth, both alone and in combination	89
	ABT-888/veliparib		NCT01085422, NCT01576172, NCT00892736	PCa	inhibited PARP activity; lead to DSB in PC3 cell line; increases the DNA damage induce by radiation therapy; re-sensitizes CRPC cells to radiation treatment; in combination with radiation, it lead to overexpression of senescence markers, such as, AS-bGal and p21; in vivo, it was observed DNA damage foci, which were increased when combined with radiation; there was an upregulation of AS-bGal and p…	85
				PCa	reduced cell viability and colony formnation; downregulated BRCA1 and UHRF1 protein expression; in combination with the HDAC inhibitor SAHA, there was a synergism leading to increased apoptosis and DNA damage; the combination targeted the UHRF1/BRCA1 complex, leading to BRCA1 degradation; in vivo, the combination resulted in reduced tumor growth	90
	AZD2461		N.a.	PCa	had an anti-tumoral effect, which was enhanced when in combination woth the HDAC inhibitor VPA; there was na increase in apoptotic levels; decreased Rad51 and Mre11, while upregulating H2AX in the PTEN mutant PC3 cells	91
				CRPC	inhibited cell proliferation, promoted caspase 3-mediated apoptosis; reduced VEGF expression; treatment was more effective in PTEN- cell lines	167
	rucaparib		NCT03413995, NCT04179396, NCT04253262, NCT02952534, NCT02975934, NCT03533946, NCT03338790, NCT03840200, NCT03572478, NCT04455750, NCT03442556, NCT04676334, NCT04171700	PCa	induced DNA breaks, with foci of x-H2AX, p53BP1 and Rad51, leading to a synergism with radiation therapy, with decreased colony formation and senescence induction; the effect was more notorius in ETS gene fusion+ cells and PTEN- cells;	86
	VP-16/etoposide phosphate	TOP2 inhibitor	NCT00176605, NCT00483561, NCT01084759, NCT00973882, NCT00003084, NCT00627354, NCT00514540, NCT00028769, NCT00151060, NCT00004054	PCa	had anti-tumor properties in different PCa cells, being more effective in CRPC cells, however displyaing some citotoxic effects; in some cells, ADT enhanced the effect of VP-16	168
Abbreviations: N.a. - not applicable; PCa - prostate cancer; CRPC - castration-resistant prostate cancer

## Sheet: Sup. Table 2
Supplementary Table 2. Potential epigenetic targets and epi-drugs for the management of therapeutic resistant prostate cancer.
Target	Drug	Mechanism of action	Clinical Trials Identifier	Tumor type	Drug effects	References
BET	OTX015/MK-8628/birabresib	BRD2/3/4 inhibitor	NCT02259114, NCT01713582	PCa	impairs the neoplastic properties of PCa stem cells; reduces cell proliferation and induces cell cycle arrest at S-phase; reduced MYC expression; controls CSC renewel and its tumorigenic potential; in vivo, impaired tumor growth and decrease tumor weight	191
	JQ1	BRD4 inhibitor	N.a.	PCa	treatment inhibited cell proliferation, BUT promoted invasion and metastasis in a BET-independent manner; treatment inhibited FOXA1 gene expression, impairing its repressive function, leading to an activation of EMT processes, chemokine and adhesion signaling pathways --> precision medicine! not suited for tumors with high FOXA1 expression and activity	184
				hematologic and solid tumors, including PCa	lead to BRD4 degradation; decreased proliferation and induced apoptosis; reduced c-MYC and PD-L1 expression; increased the response to standard chemotherapeutics	190
				CRPC	lead to BET inhibiton; impaired the binding of BRD2/4 to the N-terminal of AR, inhibiting the binding to ARE and the transcription of target genes; decreased tumor cell proliferation; lead to a downregulation in AR expression	192
				PCa	inhibited BRD4; upregulated p21 via FOXO1, and cyclin D1 expression; downregulated c-MYC, via p21, and Bcl-2 expression; reduced proliferation; lead to cell cycle arrest at G0/G1 phase; induced apoptosis; attenuate invasion and migration; in vivo, decrease tumor growth	193
				mCRPC	inhibits BRD4; decreases the expression and function of the bromodomain target gene c-MYC, which decrease ligand-independent AR activation and PCa cells survival	194
				CRPC	inhibits BET proteins; decreases AR signaling; regulates mRNA splicing, decreasing AR-V7 expression; decreases tumor cell and patient-derived organoids growth	195
				CRPC	inhibited BET proteins; increased MHC I expression and tumor cells immunogenecity; reduced PD-L1 expression; attenuated PCa progression; modulated immune-related gene expression; in vivo, in combination with anti-CTLA-4 therapy increased CD8 T cells and reduced Treg infiltration	196
				solid tumors, including PCa	inhibits cell proliferation in a dose-dependent manner; reduced PD-L1 and PD-l2 expression	197
	GSK1210151A		N.a.	CRPC	inhibits BET proteins; decreases AR signaling; regulates mRNA splicing, decreasing AR-V7 expression; decreases tumor cell and patient-derived organoids growth	195
	Y08060		N.a.	PCa	decreases tumor cell growth, impairs colony formation, decreases MYC, AR and its target genes' expression; in vivo, low toxicity and good effecacy	198
	CPI-203		N.a.	PCa, including CRPC	downregulated BRD4 and c-MYC expression, leading to AR signaling inhibition; regulated histone crotonylation; reduced cell proliferation, migration and invasion	199
	AZD5153		NCT03205176	PCa	reduced proliferation, induced apoptosis and cell cycle arrest; inhibited BRD4, reducing the targets cyclin D1, Myc, Bcl-2, FOSL1 and CDK4 expression; in vivo, inhibited tumor growth	200
	I-BET151		N.a.	CRPC	inhibits BET proteins; decreases AR signaling; regulates mRNA splicing, decreasing AR-V7 expression; decreases tumor cell and patient-derived organoids growth	195
	SF2523		N.a.	PCa	impaired cell proliferation and survival, inducing apoptosis; decreased the expression of BRD4-regulated genes, such as cyclin D1, c-MYC and AR; impaired AKT activation; in vivo, impaired tumor growth, BRD4-regulated gene expression and AKT activation	118
	WWL0245		N.a.	AR+PCa	selective against BETi sensitive cell lines; lead to ubiquitin-proteosomal degradation; induced cell cycle arrest at G0/G1; promoted apoptosis in AR+ tumor cells; decreased AR, PSA and c-Myc expression	201
	I-BET762/molibresib	BET inhibitor	NCT04471974, NCT02711956	Solid and hematoligcal tumors, including PCa	inhibits BET proteins; impairs tumor cell proliferation; downregulated c-MYC expression; in combination with standar of care therapeutics, had a synergistic effect in vitro; in in vivo models of PCa displayed anti-tumor; effects, decreasing tumor growth and modulating gene expression, in a dose-dependet manner; in CRPC in vitro models with GR overexpression, it inhibited GR receptor expression, i…	202
	ZEN-3694		NCT04986423, NCT02711956, NCT02705469, NCT04471974, NCT04145375	PCa	inhibits BRD4, blocking its binding to acetylated histone and impairing the activation of the transcription factor E2F1, downregulating NEPC lineage plastivity gene expression and reducing NEPC tumor cell growth; in patient-derived xenograft cultures, treatment increased apoptosis; in patients, and in combination with enzalutamide or abiraterone, it lead to prolonged disease control	177
				CRPC	inhibited DHT-driven AR target genes expression; impaired BRD4 recruitment to PSA and TMPRSS2 regulatory regions; it inhibited cell proliferation and AR-V7 activity; inhibited the activity of AR LBD-mutants; reduced MYC and TMPRSS2/ETS function	203
	ABBV-744		N.a.	PCa	potent and selective inhibitor of BD2 domain; treatment impaired BRD4 binding to AR and its function as transcription factor; impaired tumor cell proliferation; lead to cell cycle arrest at G1; it regulated Ar, MYC and E2F1 expression; in vivo, it retained a potent anti-neoplastic effect	204
	Y06014		N.a.	PCa	binded and inhibited BRD4; impaired cell growth and colony formation; downregulated AR-target genes expression	205
	NEO2734		N.a.	PCa with SPOP mutations	inhibited BET and CBP/p300 activity; reduced H3 acetylation levels at BRD4 target genes, such as c-MYC and RAC1; reduced cell proliferation and colony formation; in vivo, had na anti-tumoral activity and inhibited AKT and AR activity; organoids with SPOP mutations, responded to treatment, with increased levels of apoptosis	206
	dBET6	BET protein degrader	N.a.	PCa	impaired DNA replication and cell proliferation in a dose-dependet manner; induced apoptosis; decreased MYC and IFN-G-dependent PD-L1 expression; had na anti-tumoral effect; reverted chemoresistance	184
HAT	A-485	CBP/p300 inhibitor	N.a.	PCa	in AR+ tumor cells, it inhibited CBP and p300; reduced cell proliferation and AR-dependent transcript activity in both androgen-sensitive and resistant cells; in vivo, it inhibited CRPC tumor growth	207
	CCS1477		NCT03568656	PCa	inhibited cbp/p300; impaired cell proliferation; downregulated AR and c-MYC expression	208
	Y08197		N.a.	PCa	selectively inhibited cbp/p300 bromodomain activity; downregulated PSA, KLK2, TMPRSS2, c-MYC and ERG expression; impaired cell growth, migration and invasion, and induced cell cycle arrest and apoptosis	209
	I-CBP112 + A-485		N.a.	PCa	A-485 inhibited the HAT domain, while I-CBP112 binds to the acetyl-lysine binsding bromodomain; both drugs synergized to reduce PCa cells proliferation; reduced the presence of p300 in the chromatin; downregulated gene expression of PSA and c-MYC	187
HDAC	Trichostatin A/TSA	HDAC I and II inhibitor	N.a.	CRPC	inhibites HDAC activity and the EGFR-STAT3 signaling pathway; impaired proliferation and induced cell cycle arrest and apoptosis; decreased EGFR, STAT3, cyclin D1, CDK6 and BCL-2 expression; increased BAX expression	210
				CRPC	reverted EMT process, decreasing invasion and migration; increased ECAD expression, while downregulating Vimentin and Slug	212
				PCa	used in combination with the proteosome inhibitor bortezomib, had a synergistic effect; induced apoptosis; inhibited NF-kappaB in AR-independent cells; upregulated caspase-3; in combination with chemotherapy, induced apoptosis and had cytotoxic effects	181
				PCa	inhibited HDAC; decreased JMJD2B and survivin expression; induced apoptosis	212
				PCa	increased CST6 expressionboth at the transcript and protein levels; impaired cell proliferation and invasion; in vivo, impaired tumor growth and the presence of metastases in the lung	212
				mCRPC	had na anti-tumoral effect more pronunced in chemotherapy-resistante CRPC cells; induced apoptosis; increased H4K16 acetylation levels	214
	Panobinostat/LBH-589	pan HDAC inhibitor	NCT00663832, NCT00667862, NCT00878436, NCT00493766, NCT00670553, NCT00419536	PCa	decreased cell viability; in combination with the DNMT inhibitor hydralazine, synergistically impaired cell proliferation, colony formation and invasion, while inducing apoptosis	215
				PCa	increased the levels of H3K9 acetylation; reduced HDAC1, 3 and 4 expression; enhanced the response of tumor cells to ADT	216
				CRPC	decreased cell proliferation; induced cell cycle arrest at G2/M	217
				PCa	in HSPC cells, it induced cell cycle arrest and apoptosis, while in CRPC cells, the response was more reduced and the cell cycle arrest was only observed at G2 phase; decreased HDAC6 activity and increased ERK activity, which further downregulated HDAC6 expression, leading to cell cycle arrest at M phase	218
				PCa	impaired cell proliferation in a dose and time-dependent manner; in combination with RT, enhanced cell death and apoptosis, lead to cell cycle arrest at G2/M; increased DNA DSB, with reduced activation of the NHEJ and HR pathways	186
				PCa	used in combination with zoleronic acid, had a synergistic effect, reducing cell proliferation and inducing apoptosis; impaired ROS production	188
	vorinostat/SAHA	HDAC I inhibitor	NCT00330161, NCT01174199, NCT00589472, NCT00565227	PCa	inhibited HDAC1-5 activity; impaired tumor cell growth and invasion	219
				CRPC	reduced cell proliferation; induced cell cycle arrest at G2/M phase; induced apoptosis; downregulated cyclin b and cyclin A2 expression; also inhibited Akt, inducing FOXO3a activation	220
				PCa	impaired AR+ tumor cell growth; promoted apoptosis, chromatin condensation, fragmentation of DNA and depolarization of the mitochondrial membrane; decreased AR and PSA transcript levels; in combination with bicalutamide, synergistically decreased cell proliferation and promoted apoptosis	174
				AR+ CRPC	in combination with docetaxel, synergistically reduced tumor cells growth; downregulated AR-fl, AR-V, PSA and Bcl-2 expression; enhanced the response of tumor cells to docetaxel	182
	MHY219		N.a.	PCa	inhibited HDAC activity; displayed cycotocix effets on AR+ and AR- cells; increased H3 acetylation and p21 and p27 expression; downregulated HDAC class I protein expression; lead to cell cycle arrest at G2/M in CRPC cells and at G0/G1 in localized PCa cells	221
				PCa	inhibited HDAC1 activity and protein expression; displayed higher cytotoxic effects in AR+ cells, compared to AR- CRPC cells; impaired cell migration, reducing MMP1, MMP2 and TIMP-1 expression	222
	Jazz90 & Jazz167	HDAC inhibitor	N.a.	CRPC	impaired CRPC cell-based spheroids growth and branching; in vivo, no toxic effects were observed	223
				AR- CRPC	impaired cell growth; induced cell cycle arrest; inhibited HDAC activity; increased global acetylation; downregulated cyclin D1 expression	224
	CG200745		N.a.	PCa	inhibited HDAC activity, decreasing H3 acetylation; impaired tumor cells growth, induced cell cycle arrest at G1 and promoted caspase-mediated apoptosis; in combination with docetaxel, had synergistic effects in vivo	183
	MHY4381		N..a	PCa	reduced cell viabilitty; increased H3 and H4 acetylation levels; downregulated HDAC expression; induced cell cycle arrest; lead to ROS production and promoted apoptosis	225
	Valproic Acid/VPA		NCT00670046	PCa	upregulated TIF1y and ECAD expression; decreased NCAD and VIM expression; in vivo, impaired tumor growth and EMT process	226
				PCa	decreased cell proliferation; increased the levels of acetylated H3 and H4; downregulated Cdk1 and cyclin B expression; also inhibited mTOR	227
				PCa	inhibited HDAC acitivity; decreased cell growth; increased acetyltion of H3 and H4; improved the responsiveness of tumor cells to ADT	175
	A248		N.a.	CRPC	impaired cell proliferation and promoted cell cycle arrest and apoptosis; increased nuclear fragmentation; reduced Sp1, Mcl-1 and survinin expression	228
	MPT0B451	HDAC6 inhibitor	N.a.	PCa	inhibited HDAC6 activity, but also tubulin assembly; impaired cell proliferation, induced cell cycle arrest and enhanced apoptosis; in vivo, impaired tumor growth	229
	2-75		N.a.	PCa	inhibited HDAC6 activity; displayed an AR antagonistic effect; reduced AR translocation and activity; downregulated AR-V7 expression; in vivo, had potent anti-tumor effcts	230
HMT	GSK-343	EZH2 inhibitor	N.a.	PCa	decreased H3K27me3 in a dose-dependent manner; reduced proliferation, which was enhanced when combined with enzalutamide, reducing drug resistance	178
	Tazemetostat/EPZ-6438		NCT04179864, NCT04846478	PCa	inhibited EZH2 catalytic activity; decreased PCa organoid growth; reduced DNA synthesis and the levels of H3K27me3; increased IFN-alpha and IFN-y signatures; activated a stress response; increased the expression of antigen presentation-related genes; increased the levels of CD8+ T cells and M1 TAMs at the tumor site; reverted the resistance to PD-1	231
	GSK-926		N.a.	PCa	inhibited EZH2 activity; reduced cell proliferation at low doses	232
	LG1980		N.a.	PCa	in chemoresistant PCa, binds to EED, impairing its interaction with EZH2; resulted in EZH2 protein degradation; inhibited EZH2 activation; inhibited survival signaling oathways; in vivo, had reuced toxic effects; impaired tumor growth and enhanced the response to docetaxel	233
	GSK-126		N.a.	PCa	inhibited the interaction of EZH2 with AR in CRPC, reducing viability; in combination with metformin, synergistically impaired tumor cell growth	234
				CRPC	in combination with ADT, had a synergistic effetc, reducing cell proliferation and colony formation, while inducing apoptosis	179
				CRPC	impaired CRPC cell proliferation; inhibited EZH2 function in a PRC2 dependent and independent manner; enhanced the response of CRPC cells and in vivo models to both chemotherapy and radiation therapy	235
				PCa	in combination with ADT, had a synergistic effect, decreasing cell proliferation and induced cell cycle arrest and apoptosis; it downregulated AR-fl, AR-V and PSA expression; inhibited EZH2 and also Akt and other PCR2 members; decreased the levels of H3K27me3	180
HDM	NCL1	LSD1 inhibitor	N.a.	CRPC	reduced cell viability and induced apoptosis in a dose-dependent manner; decreased methylation at the histone residues; ex vivo, decreased tumor size with reduced off target effects	236
				PCa	reduced cell viability; downregulated LSD1 protein expression; induced cell cycle arrest and apoptosis; in vivo, decreased tumor size, whitout toxic effects	237
	HCI-2509		N.a.	CRPC	displayed cytotoxic effers; reduced colony formation and induced cell cyle arrest at G0/G1 phase; increased methylation of H3 residues; downregulated c-MYC; in vivo, decreased tumor size and burden, without toxic effets; in combination with docetaxel, had synergistic effects, reducing cell growth and x-MYC levels in the docetaxel-resistante cells	185
DNMT	5-AZA-2'-deoxycytidine/decitabine	DNMT inhibitor	NCT05037500	CRPC	treatment in AR- cells, in combination with sodium butyrate, increased AR mRNA levels and induced H4 acetylation in the AR promoter; induced cell cycle arrest at G2/M	189
				PCa	decreased DNA methylation, increasing SPARC expression, which correlated to better prognosis vs reduced SPARC expression	238
				PCa	reduced viability; increased miR-146a expression in AR+ cells; in vivo, impaired tumor growth and progression	239
				PCa	reduced stemness properties; decreased AR methylation and increased its expression; impaired prolioferation of CSC; in vivo, decreased tmorigenesis	240
				PCa	impaired cell proliferation and induced cell cycle arrest at S phase (DU145) and at G1 (LNCaP, 22RV1); upregulated p-H2A.X and maspin expression; decrease methylation and induced p53 and p21 expression; downregulated c-Myc expression	171
				PCa	inhibited DNMT activity; upregulating the expression of tumor supressor genes; induced cell cycle arrest and apoptosis over time	241
				PCa	inhibited cell proliferation and induced cell death; reduced methylation of the GSTP1 promoter; upregulated GSTP1 expression	242
	5-azacytidine/azacitidine		NCT03572387, NCT03572387, NCT00503984	PCa	impaired proliferation and induced apoptosis; upregulated p75NTR expression and increased caspase 3 activity	172
				PCa	inhibited DNMT activity; increased the expression of Fasl, p-FADD, p16, Bax, Bak, p21; downregulated the expression of FLIP, Bcl-2 and Bcl-XL; re-expressed the AR, sensitizing CRPC cells to ADT; in vivo, and in combination with ADT, had synergistic effects, inhibiting tumor growth and inducing apoptosis	176
	RG108		N.a.	PCa	impaired proliferation in a dose and time-dependent manner, while inducing apoptosis; decreased DNMT activity, DNMT1 expression and global DNA methylation levels; decrease methylation at GSTP1, APC and RAR-b2 promoter	243
	Hydralazine		N.a.	PCa	decreased cell viability and in combination with panabinostat, impaired proliferation, colony formation and invasion, while inducing apoptosis	188
Abbreviations: N.a. - not applicable; PCa - prostate cancer; CRPC - castration-resistant prostate cancer

## Sheet: Sup. Table 3
Supplementary Table 3. Immunotherapy for the management of therapeutic resistant prostate cancer.
Target	Drug	Mechanism of action	Clinical Trials Identifier	Tumor type	Drug effects	References
PD-L1	atezolizumab	inhibits PD-L1	NCT03016312, NCT04272645, NCT02814669, NCT03024216, NCT04262154, NCT04751929, NCT04404140, NCT05168618, NCT04446117, NCT03016312, NCT03673787, NCT03170960	metastatic CRPC	combined with enzalutamide; althought safe, did not significantly improved patients' overall survival; increased response was observed in patients whose tumors expressed CXCL9 and TAP1	246
PD-1	pembrolizumab	targets PD-1	NCT02312557, NCT03248570, NCT03658447, NCT02489357, NCT02787005	metastatic CRPC	combination with enzalutamide: decrease in PSA levels; improved response, independent of the PD-L1 status	245
				PCa	in PD-L1 positive tumors, it resulted in objective response on overall survivel and progression-free survival	247
				CRPC	in combination with enzalutamide: decreased PSA levels; led to partial responses; tumor biopsies showed presence of CD3+, CD8+, CD163+ cells infiltrates and PD-L1 expression; the patients that responded had markeres of microsatallite instability	248
				CRPC	it displayed anti-tumor activity; improving overall survival	249
				metastatic CRPC	in combination with docetaxel and prednisone, it had anti-tumor activity, with PSA response	250
				metastatic CRPC	combined with enzalutamide; for the treatment of PD-L1 harboring tumors; increased survival benefits	251
Cellular therapy	Sipuleucel-T	cellular immunitherapy	NCT00065442, NCT01560923, NCT00901342, NCT01338012	metastatic CRPC	decreased death risk; increased overall survival	252
CTLA-4	ipilimumab	targets CTLA-4	NCT00323882, NCT01510288, NCT02113657, NCT01688492, NCT02279862, NCT01194271, NCT01832870, NCT01377389	metastatic CRPC	in tumors that progressed after docetaxel, increased overall survival; suggesting anti-tumor activity	253
					in chemotheraoy naive tumors, increased progression-free survival, although no increase was depicted in overall survival	254
					it had a synergistic effect when combined with androgen deprivation therapy; potentiated T-cell response; improving clinical outcome	255
					in combination with radiotherapy, it had anti-tumor activity; led to disease control	256
	tremelimumab		NCT02788773, NCT03204812, NCT00702923, NCT02616185, NCT03385655, NCT00378482, NCT03518606, NCT02643303, NCT00075192	PCa	in hormone-naive tumors, combination with bicalutamide: delayed changes in the levels of PSA, suggesting that this combination might have benefitial effects on patients survival	257
Abbreviations: N.a. - not applicable; PCa - prostate cancer; CRPC - castration-resistant prostate cancer
